# Supplementary material for: Modulation of charge-transfer complexes assisted by complementary hydrogen bonds of nucleobases: TCNQ complexes of a uracil-substituted EDO-TTF
Source: Royal Society of Chemistry journal article supplement (doi:10.1039/c2ce25889g), 2012-01-01
Supplement: c2ce25889g.pdf [file c2ce25889g.pdf]

## Supporting Information

### **Modulation of charge-transfer complexes assisted by complementary hydrogen-bonds of nucleobases: TCNQ complexes of an uracil substituted EDO-TTF**

Tsuyoshi Murata, Yoshikazu Umemoto, Eigo Miyazaki, Kazuhiro Nakasuji and Yasushi Morita

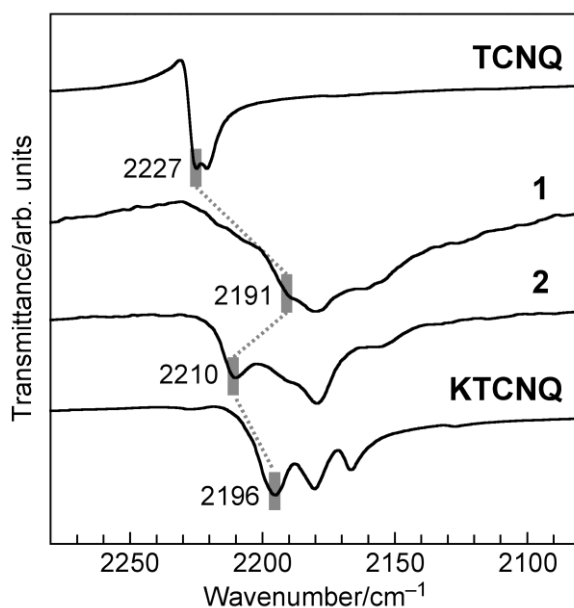

**Figure S1.** C $\equiv$ N stretching modes in the IR spectra of **1**, **2**, TCNQ and KTCNQ salt measured in KBr pellets.

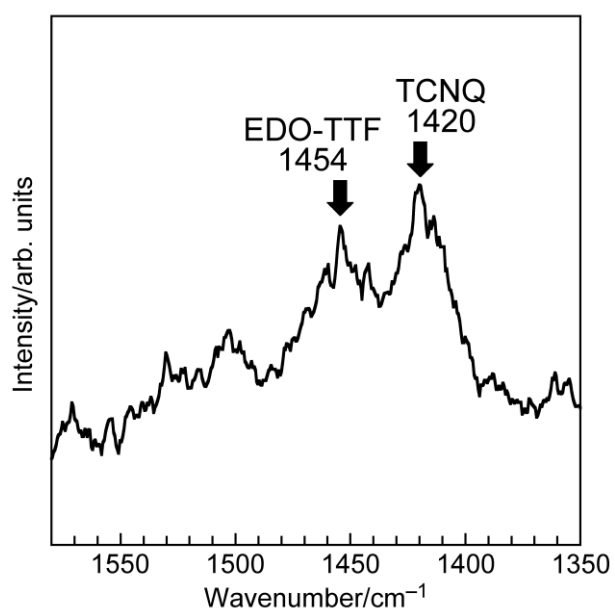

**Figure S2.** Raman spectrum of **1** with an excitation of 632.8 nm.
